# Supplementary material for: The selective disruption of presynaptic JNK2/STX1a interaction reduces NMDA receptor-dependent glutamate release
Source: PubMed Central journal article supplement (PMC6509125; doi:10.1038/s41598-019-43709-2), 2019-05-09
Supplement: 41598_2019_43709_MOESM1_ESM.pdf [file 41598_2019_43709_MOESM1_ESM.pdf]

**The selective disruption of presynaptic JNK2/STX1a interaction reduces NMDA receptor-dependent glutamate release**

Serena Marcelli<sup>1,#</sup>, Filomena Iannuzzi<sup>1,#</sup>, Elena Ficulle<sup>2,#</sup>, Dalila Mango<sup>3</sup>, Stefano Pieraccini<sup>4,5</sup>, Sara Pellegrino<sup>6</sup>, Massimo Corbo<sup>2</sup>, Maurizio Sironi<sup>4,5</sup>, Anna Pittaluga<sup>7,8</sup>, Robert Nisticò<sup>3,9</sup>, Marco Feligioni<sup>1,2\*</sup>

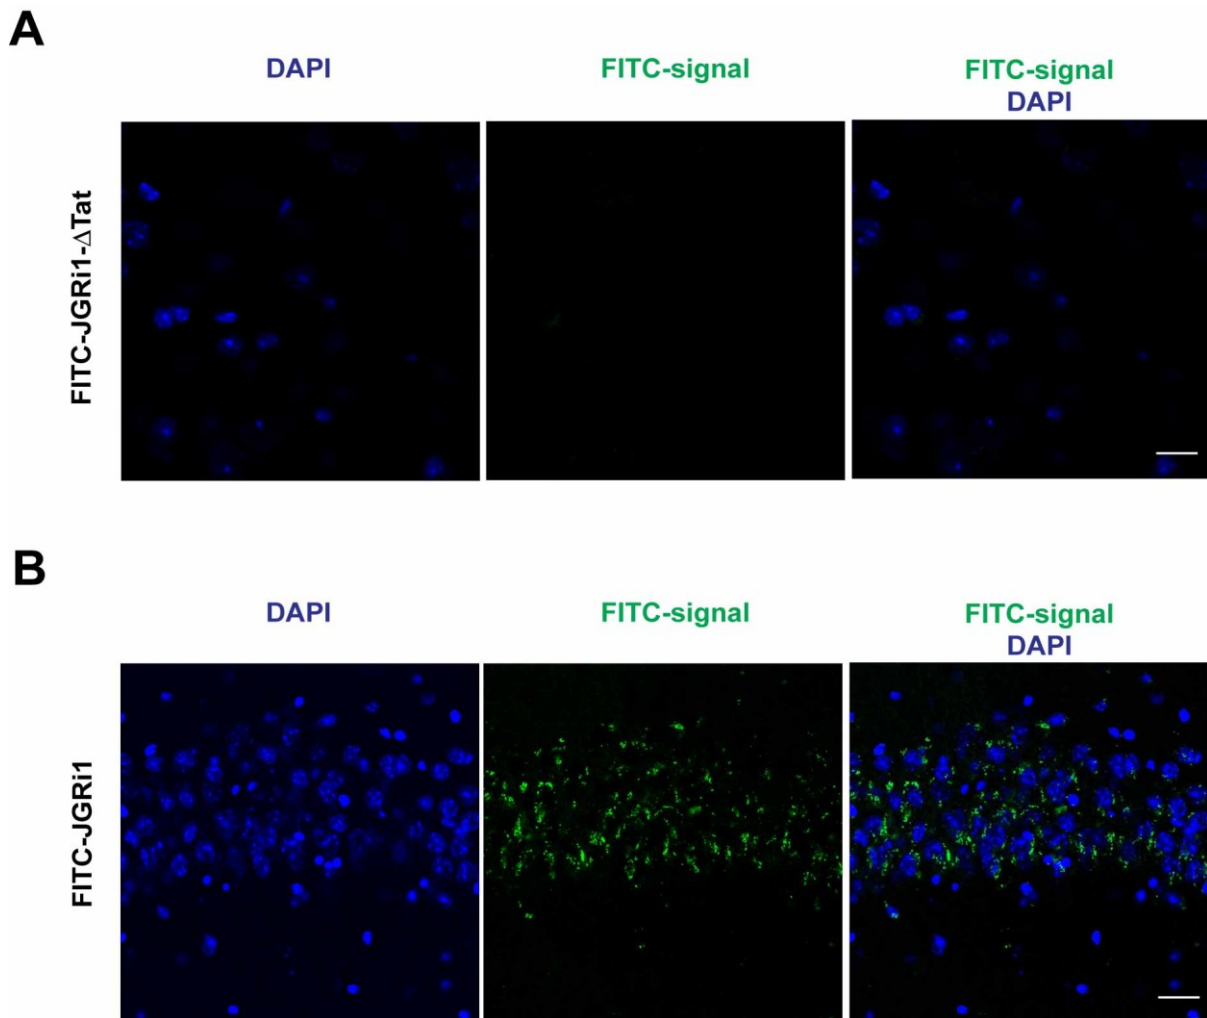

**Figure S1.**

A) FITC-JGRi1- $\Delta$ Tat (20mg/kg) was intraperitoneally administered and its brain distribution detected by confocal microscopy. Cortical tissue has been examined 3 h after injection and no FITC fluorescence was detected. Scale bar = 15  $\mu$ m.

B) FITC-JGRi1 (20mg/kg) was intraperitoneally administered and its brain distribution detected by confocal microscopy. Hippocampal tissue has been examined at several time points and the FITC fluorescence was detected until 24 h after injection. Scale bar = 15  $\mu$ m.

Mouse brain section

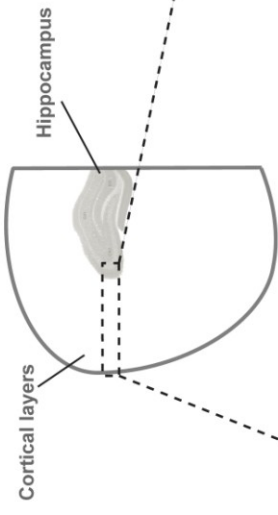

Gray image

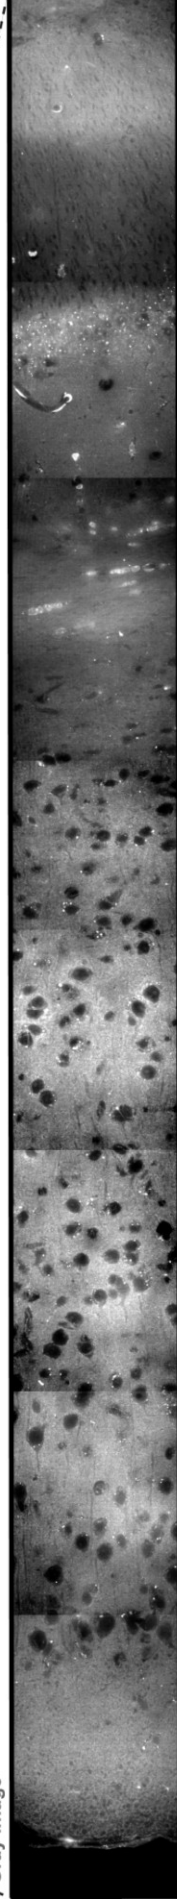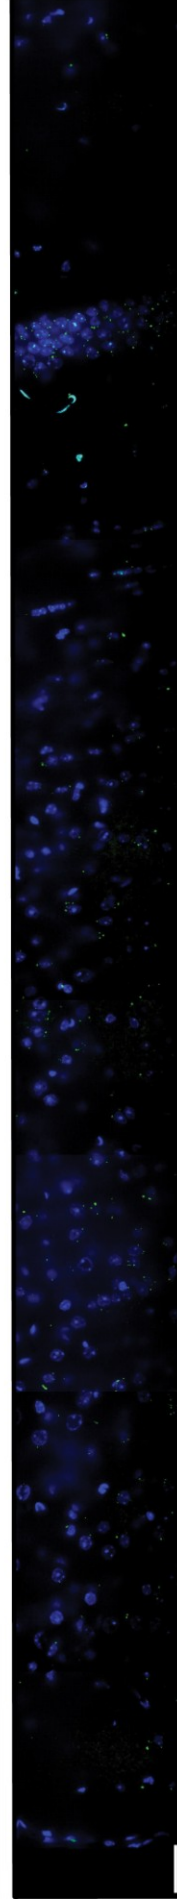

FITC-JGR1  
DAPI

**Figure S2.**

FITC-JGRi1 (20mg/kg) was intraperitoneally administered and its brain distribution detected by confocal microscopy. Cortical tissue has been examined 24 h after injection. The region of interest has been indicated on the representative section drawn in the cartoon. The gray image is a collage of several field of observation, at 60x magnification, of a representative area of the brain from cortical-to-hippocampal sites. The FITC-JGRi1/DAPI image of the same area is here showed. Scale bar = 10  $\mu$ m.
